# Supplementary material
Source: PubMed Central journal article supplement (PMC31890)

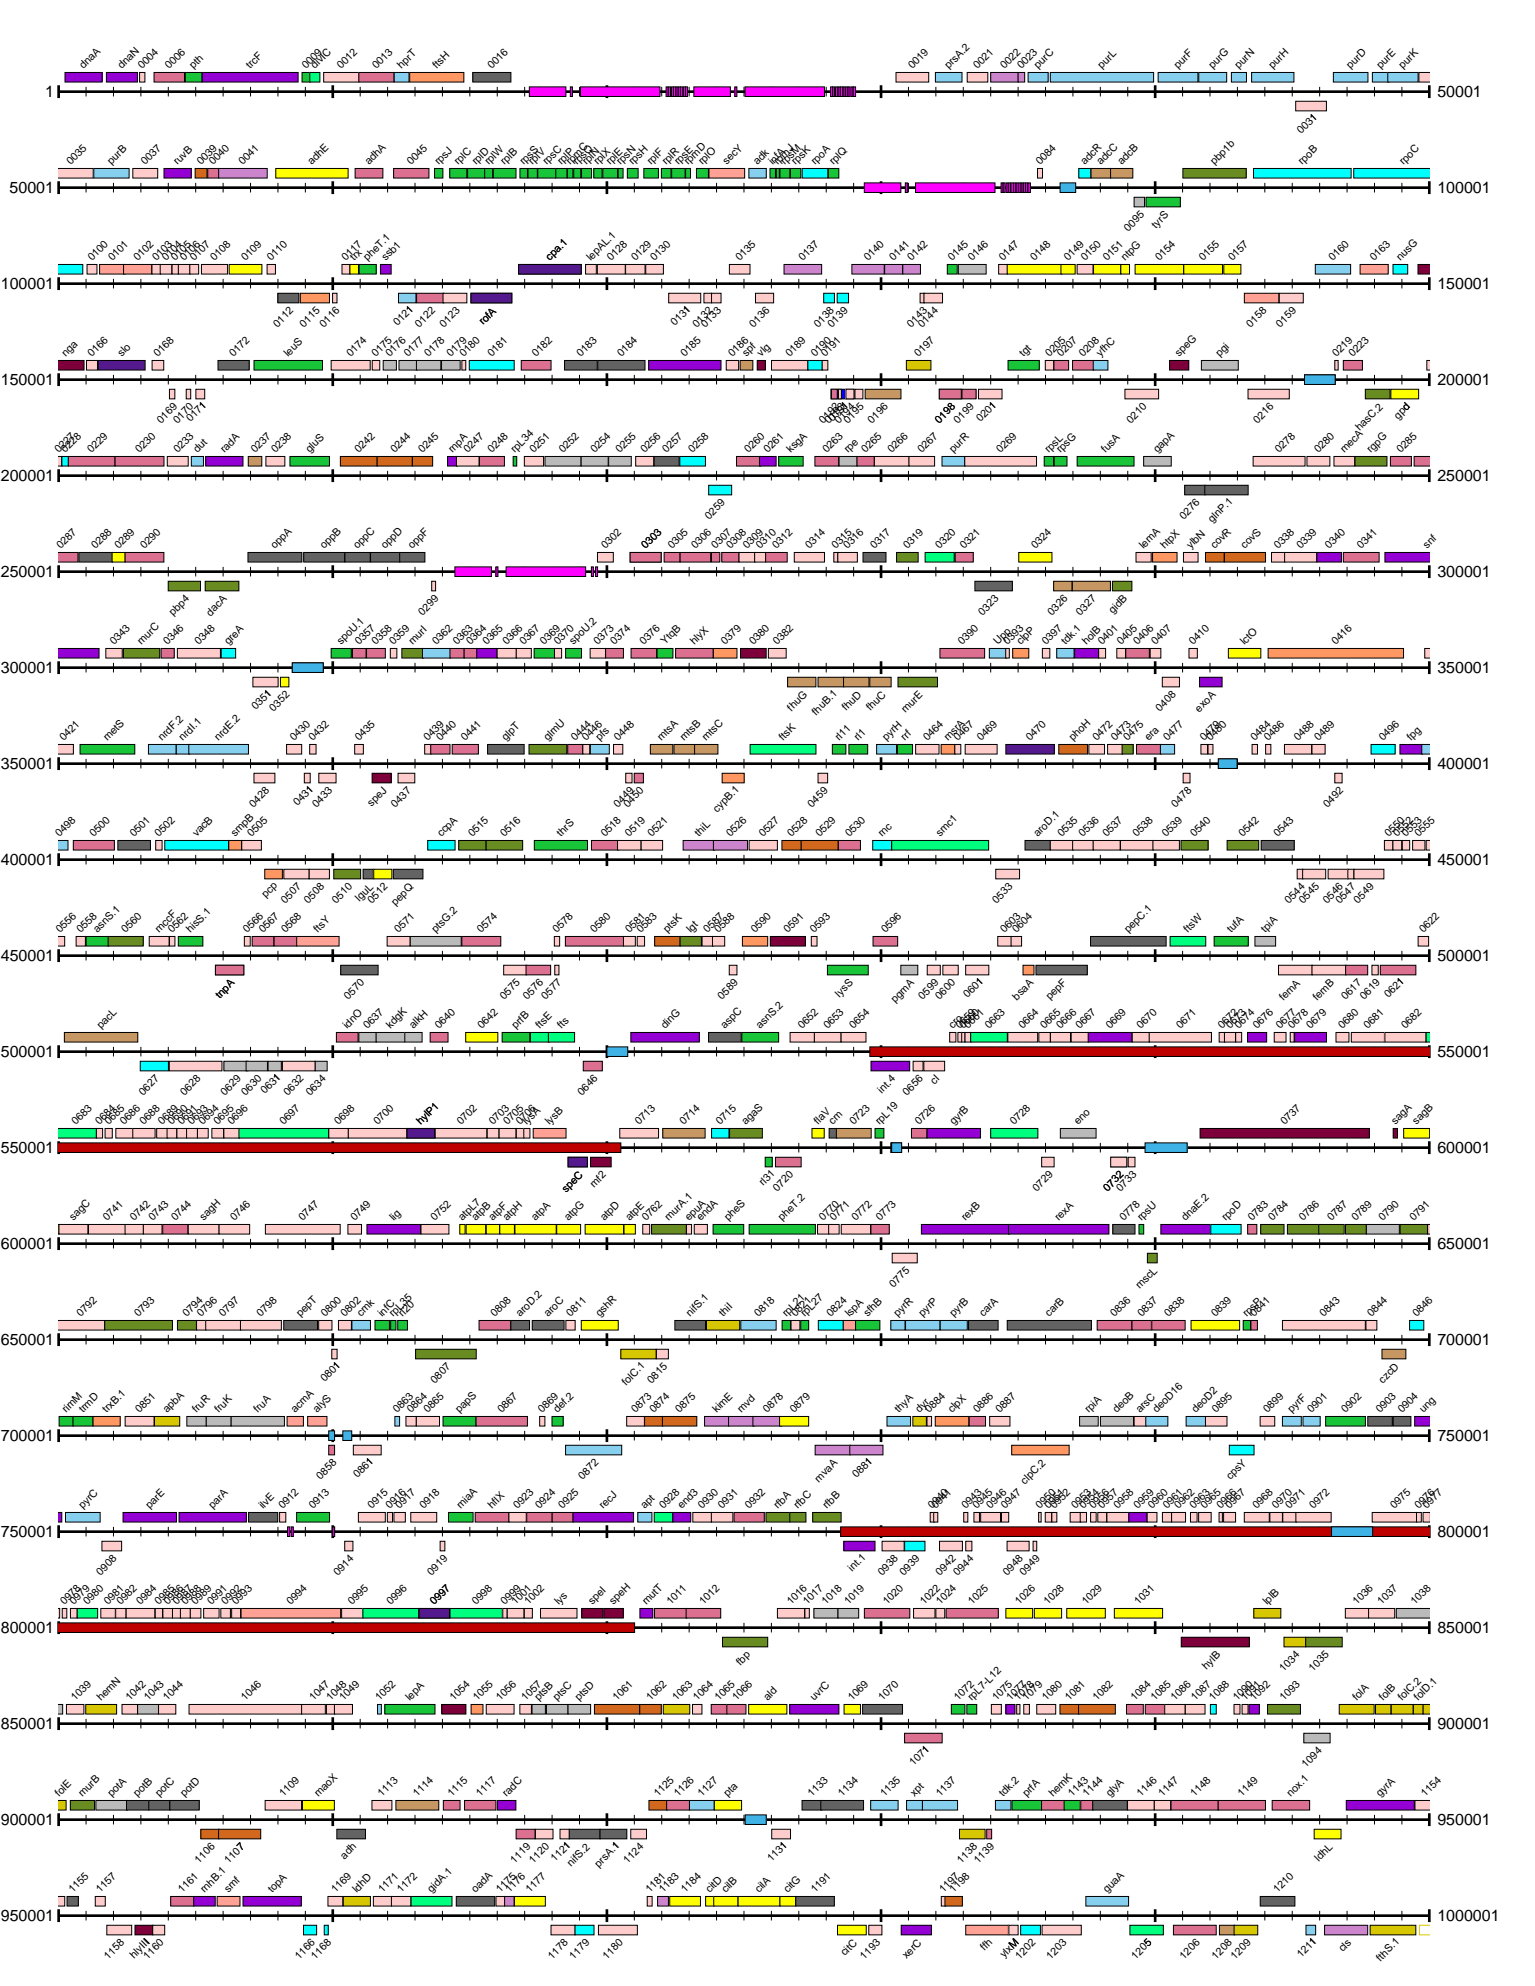

Supplement: pnas_98_8_4658__8.pdf [file pnas_98_8_4658__8.pdf]
